# Supplementary material for: Towards flexible large-scale, environmentally sustainable methanol and ammonia co-production using industrial symbiosis
Source: Royal Society of Chemistry journal article supplement (doi:10.1039/d4su00647j), 2024-12-20
Supplement: d4su00647j1.pdf [file d4su00647j1.pdf]

## **Towards Flexible Large-Scale Environmentally Sustainable Methanol and Ammonia Production using Industrial Symbiosis**

Joshua Magson<sup>a</sup>, Thérèse Lee Chan<sup>b</sup>, Akeem Mohammed<sup>b</sup>, Keeran Ward<sup>\*a</sup>

<sup>a</sup>School of Chemical and Process Engineering (SCAPE), University of Leeds, Leeds, LS2 9JT, U.K

<sup>b</sup>Department of Chemical Engineering, University of the West Indies, St. Augustine, Trinidad, WI.

\*Corresponding author; Email: [k.r.ward@leeds.ac.uk](mailto:k.r.ward@leeds.ac.uk);

### **Appendix A- Supplementary data**

## 1. Electrolyser capacity requirements for hydrogen production

Within one year of the introduction of the Clean Hydrogen Production Tax Credit in the United States, 9 GW of electrolyser projects were announced and at the end of 2022, the global installed electrolyser capacity reached approximately 700 MW.<sup>1</sup>

The electrolyser capacity was determined based on the methodology outlined by González-Garay *et al.*,<sup>2</sup> and a proton exchange membrane (PEM) type electrolyser was used since it has the highest technology readiness level (TRL) alongside alkaline electrolysers.<sup>3</sup> The value of the enthalpy for water electrolysis was assumed to be 65.83 kWh per kmol of water which equates to 32.92 kWh per kg of H<sub>2</sub> and the electrical efficiency of the PEM electrolyser was assumed to be 70.5%.<sup>2</sup>

Using the electrical efficiency and the equivalent enthalpy of water electrolysis in terms of hydrogen production, the real energy of water electrolysis was calculated:

$$\text{Real energy} = \frac{\text{Enthalpy of water electrolysis}}{\text{Electrolyser efficiency}} = \left( \frac{32.92}{0.705} \right) \text{ kWh kg}^{-1} \text{ H}_2 = 46.7 \text{ kWh kg}^{-1} \text{ H}_2.$$

Equation S1

The total amount of H<sub>2</sub> required for the 300,000 t y<sup>-1</sup> e-methanol plant was determined as 6849 kg H<sub>2</sub> h<sup>-1</sup>. The required size of the electrolyser was then calculated based on a solar capacity factor of 0.241 for Louisiana.<sup>4</sup>

$$\text{Size of the electrolyser} = \frac{\text{Real energy} \times \text{H}_2 \text{ Production Rate}}{\text{Solar Capacity Factor}} = \left( \frac{0.0467 \times 6849}{0.241} \right) \text{ MW} = 1327 \text{ MW}.$$

Equation S2

The current solar energy generation within Louisiana is 13,000 MW, thereby providing more than sufficient energy to be fed into water electrolysers for the co-production of ammonia and methanol. Although, the electrolyser capacity is almost twice the amount of the current globally installed capacity, it is anticipated that there will be a significant uptick in H<sub>2</sub> production via water electrolysis with a predicted installed capacity of 175 GW by 2030.<sup>1</sup> Therefore, if this were achieved, this co-production scheme would only require less than 1% of the global installed capacity.

## 2. LCI and LCIA results overview

Utilising the LCA methodology presented in Section X in the main article, **Table S1** gives the LCI inventories aligned to mass and energy balances for each co-production scheme, retrieved from Ecoinvent v3.7. The characterised impacts are shown in **Tables S2-S25**, calculated using ReCiPe midpoint and endpoint H 2016.

**Table S1.** LCI datasets retrieved from Ecoinvent v3.7 databases

| Flow                                    | Technology                                                                                                                                                                                           | Ecoinvent Database                                                                                                         |
|-----------------------------------------|------------------------------------------------------------------------------------------------------------------------------------------------------------------------------------------------------|----------------------------------------------------------------------------------------------------------------------------|
| Natural Gas for feedstock and heating   | GHR <sub>MeOH</sub> , ATR <sub>MeOH</sub> , SMR <sub>MeOH</sub><br>ATR <sub>NH3</sub> , SMR <sub>NH3</sub> , Capture from Natural Gas Power Plant                                                    | Natural gas, high pressure {US}  market for   APOS, U                                                                      |
| Water                                   | GHR <sub>MeOH</sub> , ATR <sub>MeOH</sub> , SMR <sub>MeOH</sub><br>ATR <sub>NH3</sub> , SMR <sub>NH3</sub> , Green H <sub>2</sub> , E-methanol, CO <sub>2</sub> Capture from Natural Gas Power Plant | Water, deionised, from tap water, at user {RoW}  market for water, deionised, from tap water, at user   APOS, U            |
| Electricity production from grid        | GHR <sub>MeOH</sub> , ATR <sub>MeOH</sub> , SMR <sub>MeOH</sub><br>ATR <sub>NH3</sub> , SMR <sub>NH3</sub> , E-Methanol                                                                              | Electricity, high voltage {SERC}  market for   APOS, U                                                                     |
| Electricity production from solar power | Green H <sub>2</sub>                                                                                                                                                                                 | Electricity, low voltage {SERC}  electricity production, photovoltaic, 570kWp open ground installation, multi-Si   APOS, U |
| MEA                                     | Capture from Natural Gas Power Plant                                                                                                                                                                 | Monoethanolamine {GLO}  ethanolamine production   APOS, U                                                                  |
| Process emissions                       | GHR <sub>MeOH</sub> , ATR <sub>MeOH</sub> , SMR <sub>MeOH</sub><br>ATR <sub>NH3</sub> , SMR <sub>NH3</sub> , E-Methanol                                                                              | Carbon dioxide, fossil                                                                                                     |

**Table S2.** BAU GHR-SMR Midpoint Characterisation (ReCiPe Midpoint H 2016), FU= 1kgNH<sub>3</sub>

| Impact Category                         | Unit                          | Total    | Process Emissions | Natural Gas | Water    | Electricity Grid |
|-----------------------------------------|-------------------------------|----------|-------------------|-------------|----------|------------------|
| Global warming                          | kg CO2 eq                     | 1.13E+00 | 6.96E-01          | 2.49E-01    | 3.41E-04 | 1.86E-01         |
| Stratospheric ozone depletion           | kg CFC11 eq X10 <sup>-4</sup> | 2.86E-07 | 0.00E+00          | 2.14E-07    | 2.94E-10 | 7.21E-08         |
| Ionizing radiation                      | kBq Co-60 eq                  | 6.33E-02 | 0.00E+00          | 3.10E-03    | 4.19E-05 | 6.02E-02         |
| Ozone formation, Human health           | kg NOx eq                     | 6.01E-04 | 0.00E+00          | 4.02E-04    | 7.60E-07 | 1.98E-04         |
| Fine particulate matter formation       | kg PM2.5 eq                   | 7.04E-04 | 0.00E+00          | 3.15E-04    | 7.61E-07 | 3.89E-04         |
| Ozone formation, Terrestrial ecosystems | kg NOx eq                     | 6.48E-04 | 0.00E+00          | 4.46E-04    | 7.75E-07 | 2.02E-04         |
| Terrestrial acidification               | kg SO2 eq                     | 1.36E-03 | 0.00E+00          | 9.62E-04    | 1.13E-06 | 3.94E-04         |
| Freshwater eutrophication               | kg P eq                       | 1.41E-04 | 0.00E+00          | 1.12E-05    | 1.80E-07 | 1.29E-04         |
| Marine eutrophication                   | kg N eq                       | 1.34E-05 | 0.00E+00          | 4.09E-06    | 1.91E-08 | 9.34E-06         |
| Terrestrial ecotoxicity                 | kg 1,4-DCB                    | 9.23E-02 | 0.00E+00          | 3.03E-02    | 5.83E-04 | 6.15E-02         |
| Freshwater ecotoxicity                  | kg 1,4-DCB                    | 6.29E-03 | 0.00E+00          | 2.25E-03    | 1.51E-05 | 4.02E-03         |
| Marine ecotoxicity                      | kg 1,4-DCB                    | 8.36E-03 | 0.00E+00          | 2.82E-03    | 2.03E-05 | 5.52E-03         |
| Human carcinogenic toxicity             | kg 1,4-DCB                    | 1.98E-02 | 0.00E+00          | 1.03E-02    | 1.70E-04 | 9.30E-03         |
| Human non-carcinogenic toxicity         | kg 1,4-DCB                    | 2.13E-01 | 0.00E+00          | 4.79E-02    | 3.45E-04 | 1.65E-01         |
| Land use                                | m2a crop eq                   | 9.13E-03 | 0.00E+00          | 1.01E-03    | 1.30E-05 | 8.11E-03         |
| Mineral resource scarcity               | kg Cu eq                      | 3.05E-04 | 0.00E+00          | 1.93E-04    | 2.61E-06 | 1.09E-04         |
| Fossil resource scarcity                | kg oil eq                     | 5.00E-01 | 0.00E+00          | 4.50E-01    | 8.73E-05 | 5.00E-02         |
| Water consumption                       | m3                            | 1.42E-03 | 0.00E+00          | 1.98E-04    | 3.15E-04 | 9.05E-04         |

**Table S3.** Hybrid GHR-SMR Midpoint Characterisation (ReCiPe Midpoint H 2016), FU= 1kgNH<sub>3</sub>

| Impact Category                         | Unit                          | Total    | Process Emissions | Natural Gas | Water    | Electricity Grid | Green H2 |
|-----------------------------------------|-------------------------------|----------|-------------------|-------------|----------|------------------|----------|
| Global warming                          | kg CO2 eq                     | 1.00E+00 | 5.16E-01          | 2.25E-01    | 3.29E-04 | 1.80E-01         | 8.11E-02 |
| Stratospheric ozone depletion           | kg CFC11 eq X10 <sup>-4</sup> | 3.00E-07 | 0.00E+00          | 1.93E-07    | 2.84E-10 | 6.95E-08         | 3.67E-08 |
| Ionizing radiation                      | kBq Co-60 eq                  | 6.70E-02 | 0.00E+00          | 2.80E-03    | 4.05E-05 | 5.81E-02         | 6.13E-03 |
| Ozone formation, Human health           | kg NOx eq                     | 7.70E-04 | 0.00E+00          | 3.63E-04    | 7.34E-07 | 1.91E-04         | 2.15E-04 |
| Fine particulate matter formation       | kg PM2.5 eq                   | 8.22E-04 | 0.00E+00          | 2.85E-04    | 7.36E-07 | 3.75E-04         | 1.62E-04 |
| Ozone formation, Terrestrial ecosystems | kg NOx eq                     | 8.23E-04 | 0.00E+00          | 4.03E-04    | 7.49E-07 | 1.95E-04         | 2.25E-04 |
| Terrestrial acidification               | kg SO2 eq                     | 1.57E-03 | 0.00E+00          | 8.69E-04    | 1.09E-06 | 3.80E-04         | 3.17E-04 |
| Freshwater eutrophication               | kg P eq                       | 1.77E-04 | 0.00E+00          | 1.01E-05    | 1.74E-07 | 1.25E-04         | 4.15E-05 |
| Marine eutrophication                   | kg N eq                       | 1.87E-05 | 0.00E+00          | 3.69E-06    | 1.84E-08 | 9.01E-06         | 6.02E-06 |
| Terrestrial ecotoxicity                 | kg 1,4-DCB                    | 1.60E+00 | 0.00E+00          | 2.73E-02    | 5.63E-04 | 5.93E-02         | 1.51E+00 |
| Freshwater ecotoxicity                  | kg 1,4-DCB                    | 2.01E-02 | 0.00E+00          | 2.03E-03    | 1.46E-05 | 3.88E-03         | 1.42E-02 |
| Marine ecotoxicity                      | kg 1,4-DCB                    | 2.68E-02 | 0.00E+00          | 2.55E-03    | 1.97E-05 | 5.32E-03         | 1.89E-02 |
| Human carcinogenic toxicity             | kg 1,4-DCB                    | 3.77E-02 | 0.00E+00          | 9.32E-03    | 1.64E-04 | 8.97E-03         | 1.93E-02 |
| Human non-carcinogenic toxicity         | kg 1,4-DCB                    | 4.03E-01 | 0.00E+00          | 4.33E-02    | 3.34E-04 | 1.59E-01         | 2.00E-01 |
| Land use                                | m2a crop eq                   | 4.14E-02 | 0.00E+00          | 9.09E-04    | 1.25E-05 | 7.82E-03         | 3.27E-02 |
| Mineral resource scarcity               | kg Cu eq                      | 1.27E-03 | 0.00E+00          | 1.75E-04    | 2.52E-06 | 1.05E-04         | 9.89E-04 |
| Fossil resource scarcity                | kg oil eq                     | 4.76E-01 | 0.00E+00          | 4.06E-01    | 8.44E-05 | 4.82E-02         | 2.11E-02 |
| Water consumption                       | m3                            | 4.19E-03 | 0.00E+00          | 1.79E-04    | 3.05E-04 | 8.72E-04         | 2.83E-03 |

**Table S4.** BAU GHR-ATR Midpoint Characterisation (ReCiPe Midpoint H 2016), FU= 1kgNH<sub>3</sub>

| Impact Category                         | Unit                          | Total    | Process Emissions | Natural Gas | Water    | Electricity Grid |
|-----------------------------------------|-------------------------------|----------|-------------------|-------------|----------|------------------|
| Global warming                          | kg CO2 eq                     | 8.89E-01 | 4.72E-01          | 2.06E-01    | 4.96E-04 | 2.11E-01         |
| Stratospheric ozone depletion           | kg CFC11 eq X10 <sup>-4</sup> | 2.59E-07 | 0.00E+00          | 1.77E-07    | 4.27E-10 | 8.15E-08         |
| Ionizing radiation                      | kBq Co-60 eq                  | 7.07E-02 | 0.00E+00          | 2.56E-03    | 6.10E-05 | 6.81E-02         |
| Ozone formation, Human health           | kg NOx eq                     | 5.58E-04 | 0.00E+00          | 3.33E-04    | 1.11E-06 | 2.24E-04         |
| Fine particulate matter formation       | kg PM2.5 eq                   | 7.01E-04 | 0.00E+00          | 2.61E-04    | 1.11E-06 | 4.40E-04         |
| Ozone formation, Terrestrial ecosystems | kg NOx eq                     | 5.98E-04 | 0.00E+00          | 3.69E-04    | 1.13E-06 | 2.28E-04         |
| Terrestrial acidification               | kg SO2 eq                     | 1.24E-03 | 0.00E+00          | 7.97E-04    | 1.65E-06 | 4.46E-04         |
| Freshwater eutrophication               | kg P eq                       | 1.56E-04 | 0.00E+00          | 9.30E-06    | 2.62E-07 | 1.46E-04         |
| Marine eutrophication                   | kg N eq                       | 1.40E-05 | 0.00E+00          | 3.38E-06    | 2.78E-08 | 1.06E-05         |
| Terrestrial ecotoxicity                 | kg 1,4-DCB                    | 9.55E-02 | 0.00E+00          | 2.50E-02    | 8.48E-04 | 6.96E-02         |
| Freshwater ecotoxicity                  | kg 1,4-DCB                    | 6.44E-03 | 0.00E+00          | 1.86E-03    | 2.19E-05 | 4.55E-03         |
| Marine ecotoxicity                      | kg 1,4-DCB                    | 8.61E-03 | 0.00E+00          | 2.34E-03    | 2.96E-05 | 6.24E-03         |
| Human carcinogenic toxicity             | kg 1,4-DCB                    | 1.93E-02 | 0.00E+00          | 8.54E-03    | 2.47E-04 | 1.05E-02         |
| Human non-carcinogenic toxicity         | kg 1,4-DCB                    | 2.26E-01 | 0.00E+00          | 3.96E-02    | 5.02E-04 | 1.86E-01         |
| Land use                                | m2a crop eq                   | 1.00E-02 | 0.00E+00          | 8.34E-04    | 1.89E-05 | 9.17E-03         |
| Mineral resource scarcity               | kg Cu eq                      | 2.87E-04 | 0.00E+00          | 1.60E-04    | 3.79E-06 | 1.23E-04         |
| Fossil resource scarcity                | kg oil eq                     | 4.29E-01 | 0.00E+00          | 3.72E-01    | 1.27E-04 | 5.66E-02         |
| Water consumption                       | m3                            | 1.65E-03 | 0.00E+00          | 1.64E-04    | 4.59E-04 | 1.02E-03         |

**Table S5.** Hybrid GHR-ATR Midpoint Characterisation (ReCiPe Midpoint H 2016), FU= 1kgNH<sub>3</sub>

| Impact Category                         | Unit                          | Total    | Process Emissions | Natural Gas | Water    | Electricity Grid | Green H2 |
|-----------------------------------------|-------------------------------|----------|-------------------|-------------|----------|------------------|----------|
| Global warming                          | kg CO2 eq                     | 7.60E-01 | 2.92E-01          | 1.82E-01    | 4.85E-04 | 2.04E-01         | 8.11E-02 |
| Stratospheric ozone depletion           | kg CFC11 eq X10 <sup>-4</sup> | 2.72E-07 | 0.00E+00          | 1.56E-07    | 4.17E-10 | 7.90E-08         | 3.67E-08 |
| Ionizing radiation                      | kBq Co-60 eq                  | 7.44E-02 | 0.00E+00          | 2.26E-03    | 5.96E-05 | 6.60E-02         | 6.13E-03 |
| Ozone formation, Human health           | kg NOx eq                     | 7.27E-04 | 0.00E+00          | 2.94E-04    | 1.08E-06 | 2.17E-04         | 2.15E-04 |
| Fine particulate matter formation       | kg PM2.5 eq                   | 8.19E-04 | 0.00E+00          | 2.30E-04    | 1.08E-06 | 4.26E-04         | 1.62E-04 |
| Ozone formation, Terrestrial ecosystems | kg NOx eq                     | 7.73E-04 | 0.00E+00          | 3.26E-04    | 1.10E-06 | 2.21E-04         | 2.25E-04 |
| Terrestrial acidification               | kg SO2 eq                     | 1.45E-03 | 0.00E+00          | 7.03E-04    | 1.61E-06 | 4.32E-04         | 3.17E-04 |
| Freshwater eutrophication               | kg P eq                       | 1.92E-04 | 0.00E+00          | 8.21E-06    | 2.56E-07 | 1.42E-04         | 4.15E-05 |
| Marine eutrophication                   | kg N eq                       | 1.93E-05 | 0.00E+00          | 2.99E-06    | 2.71E-08 | 1.02E-05         | 6.02E-06 |
| Terrestrial ecotoxicity                 | kg 1,4-DCB                    | 1.60E+00 | 0.00E+00          | 2.21E-02    | 8.28E-04 | 6.74E-02         | 1.51E+00 |
| Freshwater ecotoxicity                  | kg 1,4-DCB                    | 2.03E-02 | 0.00E+00          | 1.64E-03    | 2.14E-05 | 4.41E-03         | 1.42E-02 |
| Marine ecotoxicity                      | kg 1,4-DCB                    | 2.71E-02 | 0.00E+00          | 2.06E-03    | 2.89E-05 | 6.05E-03         | 1.89E-02 |
| Human carcinogenic toxicity             | kg 1,4-DCB                    | 3.72E-02 | 0.00E+00          | 7.54E-03    | 2.41E-04 | 1.02E-02         | 1.93E-02 |
| Human non-carcinogenic toxicity         | kg 1,4-DCB                    | 4.16E-01 | 0.00E+00          | 3.50E-02    | 4.91E-04 | 1.80E-01         | 2.00E-01 |
| Land use                                | m2a crop eq                   | 4.23E-02 | 0.00E+00          | 7.36E-04    | 1.85E-05 | 8.89E-03         | 3.27E-02 |
| Mineral resource scarcity               | kg Cu eq                      | 1.25E-03 | 0.00E+00          | 1.41E-04    | 3.71E-06 | 1.19E-04         | 9.89E-04 |
| Fossil resource scarcity                | kg oil eq                     | 4.05E-01 | 0.00E+00          | 3.29E-01    | 1.24E-04 | 5.48E-02         | 2.11E-02 |
| Water consumption                       | m3                            | 4.42E-03 | 0.00E+00          | 1.45E-04    | 4.48E-04 | 9.91E-04         | 2.83E-03 |

**Table S6.** BAU ATR-SMR Midpoint Characterisation (ReCiPe Midpoint H 2016), FU= 1kgNH<sub>3</sub>

| Impact Category                         | Unit                          | Total    | Process Emissions | Natural Gas | Water    | Electricity Grid |
|-----------------------------------------|-------------------------------|----------|-------------------|-------------|----------|------------------|
| Global warming                          | kg CO2 eq                     | 1.15E+00 | 8.35E-01          | 2.68E-01    | 2.71E-04 | 4.62E-02         |
| Stratospheric ozone depletion           | kg CFC11 eq X10 <sup>-4</sup> | 2.48E-07 | 0.00E+00          | 2.30E-07    | 2.33E-10 | 1.79E-08         |
| Ionizing radiation                      | kBq Co-60 eq                  | 1.83E-02 | 0.00E+00          | 3.33E-03    | 3.33E-05 | 1.50E-02         |
| Ozone formation, Human health           | kg NOx eq                     | 4.82E-04 | 0.00E+00          | 4.32E-04    | 6.04E-07 | 4.92E-05         |
| Fine particulate matter formation       | kg PM2.5 eq                   | 4.36E-04 | 0.00E+00          | 3.39E-04    | 6.05E-07 | 9.66E-05         |
| Ozone formation, Terrestrial ecosystems | kg NOx eq                     | 5.30E-04 | 0.00E+00          | 4.79E-04    | 6.16E-07 | 5.01E-05         |
| Terrestrial acidification               | kg SO2 eq                     | 1.13E-03 | 0.00E+00          | 1.04E-03    | 8.99E-07 | 9.80E-05         |
| Freshwater eutrophication               | kg P eq                       | 4.44E-05 | 0.00E+00          | 1.21E-05    | 1.43E-07 | 3.22E-05         |
| Marine eutrophication                   | kg N eq                       | 6.73E-06 | 0.00E+00          | 4.40E-06    | 1.52E-08 | 2.32E-06         |
| Terrestrial ecotoxicity                 | kg 1,4-DCB                    | 4.83E-02 | 0.00E+00          | 3.25E-02    | 4.63E-04 | 1.53E-02         |
| Freshwater ecotoxicity                  | kg 1,4-DCB                    | 3.43E-03 | 0.00E+00          | 2.42E-03    | 1.20E-05 | 1.00E-03         |
| Marine ecotoxicity                      | kg 1,4-DCB                    | 4.42E-03 | 0.00E+00          | 3.04E-03    | 1.62E-05 | 1.37E-03         |
| Human carcinogenic toxicity             | kg 1,4-DCB                    | 1.35E-02 | 0.00E+00          | 1.11E-02    | 1.35E-04 | 2.31E-03         |
| Human non-carcinogenic toxicity         | kg 1,4-DCB                    | 9.27E-02 | 0.00E+00          | 5.15E-02    | 2.74E-04 | 4.09E-02         |
| Land use                                | m2a crop eq                   | 3.11E-03 | 0.00E+00          | 1.08E-03    | 1.03E-05 | 2.02E-03         |
| Mineral resource scarcity               | kg Cu eq                      | 2.37E-04 | 0.00E+00          | 2.08E-04    | 2.07E-06 | 2.70E-05         |
| Fossil resource scarcity                | kg oil eq                     | 4.96E-01 | 0.00E+00          | 4.84E-01    | 6.94E-05 | 1.24E-02         |
| Water consumption                       | m3                            | 6.88E-04 | 0.00E+00          | 2.13E-04    | 2.51E-04 | 2.25E-04         |



**Table S7.** Hybrid ATR-SMR Midpoint Characterisation (ReCiPe Midpoint H 2016), FU= 1kgNH<sub>3</sub>

| Impact Category                         | Unit                          | Total    | Process Emissions | Natural Gas | Water    | Electricity Grid | Green H2 |
|-----------------------------------------|-------------------------------|----------|-------------------|-------------|----------|------------------|----------|
| Global warming                          | kg CO2 eq                     | 1.02E+00 | 6.32E-01          | 2.41E-01    | 2.71E-04 | 6.26E-02         | 8.11E-02 |
| Stratospheric ozone depletion           | kg CFC11 eq X10 <sup>-4</sup> | 2.68E-07 | 0.00E+00          | 2.07E-07    | 2.33E-10 | 2.42E-08         | 3.67E-08 |
| Ionizing radiation                      | kBq Co-60 eq                  | 2.94E-02 | 0.00E+00          | 2.99E-03    | 3.33E-05 | 2.02E-02         | 6.13E-03 |
| Ozone formation, Human health           | kg NOx eq                     | 6.71E-04 | 0.00E+00          | 3.88E-04    | 6.04E-07 | 6.66E-05         | 2.15E-04 |
| Fine particulate matter formation       | kg PM2.5 eq                   | 5.98E-04 | 0.00E+00          | 3.04E-04    | 6.05E-07 | 1.31E-04         | 1.62E-04 |
| Ozone formation, Terrestrial ecosystems | kg NOx eq                     | 7.24E-04 | 0.00E+00          | 4.31E-04    | 6.16E-07 | 6.78E-05         | 2.25E-04 |
| Terrestrial acidification               | kg SO2 eq                     | 1.38E-03 | 0.00E+00          | 9.30E-04    | 8.99E-07 | 1.33E-04         | 3.17E-04 |
| Freshwater eutrophication               | kg P eq                       | 9.60E-05 | 0.00E+00          | 1.09E-05    | 1.43E-07 | 4.35E-05         | 4.15E-05 |
| Marine eutrophication                   | kg N eq                       | 1.31E-05 | 0.00E+00          | 3.95E-06    | 1.52E-08 | 3.14E-06         | 6.02E-06 |
| Terrestrial ecotoxicity                 | kg 1,4-DCB                    | 1.56E+00 | 0.00E+00          | 2.92E-02    | 4.63E-04 | 2.07E-02         | 1.51E+00 |
| Freshwater ecotoxicity                  | kg 1,4-DCB                    | 1.77E-02 | 0.00E+00          | 2.17E-03    | 1.20E-05 | 1.35E-03         | 1.42E-02 |
| Marine ecotoxicity                      | kg 1,4-DCB                    | 2.35E-02 | 0.00E+00          | 2.73E-03    | 1.62E-05 | 1.85E-03         | 1.89E-02 |
| Human carcinogenic toxicity             | kg 1,4-DCB                    | 3.25E-02 | 0.00E+00          | 9.97E-03    | 1.35E-04 | 3.13E-03         | 1.93E-02 |
| Human non-carcinogenic toxicity         | kg 1,4-DCB                    | 3.02E-01 | 0.00E+00          | 4.63E-02    | 2.74E-04 | 5.53E-02         | 2.00E-01 |
| Land use                                | m2a crop eq                   | 3.64E-02 | 0.00E+00          | 9.73E-04    | 1.03E-05 | 2.73E-03         | 3.27E-02 |
| Mineral resource scarcity               | kg Cu eq                      | 1.21E-03 | 0.00E+00          | 1.87E-04    | 2.07E-06 | 3.66E-05         | 9.89E-04 |
| Fossil resource scarcity                | kg oil eq                     | 4.73E-01 | 0.00E+00          | 4.35E-01    | 6.94E-05 | 1.68E-02         | 2.11E-02 |
| Water consumption                       | m3                            | 3.58E-03 | 0.00E+00          | 1.91E-04    | 2.51E-04 | 3.04E-04         | 2.83E-03 |

**Table S8. BAU ATR-ATR Midpoint Characterisation (ReCiPe Midpoint H 2016), FU= 1kgNH<sub>3</sub>**

| Impact Category                         | Unit                          | Total    | Process Emissions | Natural Gas | Water    | Electricity Grid |
|-----------------------------------------|-------------------------------|----------|-------------------|-------------|----------|------------------|
| Global warming                          | kg CO <sub>2</sub> eq         | 9.10E-01 | 6.13E-01          | 2.26E-01    | 4.28E-04 | 7.09E-02         |
| Stratospheric ozone depletion           | kg CFC11 eq X10 <sup>-4</sup> | 2.22E-07 | 0.00E+00          | 1.94E-07    | 3.68E-10 | 2.75E-08         |
| Ionizing radiation                      | kBq Co-60 eq                  | 2.58E-02 | 0.00E+00          | 2.81E-03    | 5.26E-05 | 2.29E-02         |
| Ozone formation, Human health           | kg NO <sub>x</sub> eq         | 4.41E-04 | 0.00E+00          | 3.64E-04    | 9.53E-07 | 7.55E-05         |
| Fine particulate matter formation       | kg PM <sub>2.5</sub> eq       | 4.35E-04 | 0.00E+00          | 2.86E-04    | 9.55E-07 | 1.48E-04         |
| Ozone formation, Terrestrial ecosystems | kg NO <sub>x</sub> eq         | 4.82E-04 | 0.00E+00          | 4.04E-04    | 9.73E-07 | 7.69E-05         |
| Terrestrial acidification               | kg SO <sub>2</sub> eq         | 1.02E-03 | 0.00E+00          | 8.72E-04    | 1.42E-06 | 1.50E-04         |
| Freshwater eutrophication               | kg P eq                       | 5.97E-05 | 0.00E+00          | 1.02E-05    | 2.26E-07 | 4.93E-05         |
| Marine eutrophication                   | kg N eq                       | 7.29E-06 | 0.00E+00          | 3.70E-06    | 2.39E-08 | 3.56E-06         |
| Terrestrial ecotoxicity                 | kg 1,4-DCB                    | 5.16E-02 | 0.00E+00          | 2.74E-02    | 7.31E-04 | 2.34E-02         |
| Freshwater ecotoxicity                  | kg 1,4-DCB                    | 3.59E-03 | 0.00E+00          | 2.04E-03    | 1.89E-05 | 1.53E-03         |
| Marine ecotoxicity                      | kg 1,4-DCB                    | 4.69E-03 | 0.00E+00          | 2.56E-03    | 2.55E-05 | 2.10E-03         |
| Human carcinogenic toxicity             | kg 1,4-DCB                    | 1.31E-02 | 0.00E+00          | 9.35E-03    | 2.13E-04 | 3.54E-03         |
| Human non-carcinogenic toxicity         | kg 1,4-DCB                    | 1.07E-01 | 0.00E+00          | 4.34E-02    | 4.33E-04 | 6.27E-02         |
| Land use                                | m <sup>2</sup> a crop eq      | 4.02E-03 | 0.00E+00          | 9.13E-04    | 1.63E-05 | 3.09E-03         |
| Mineral resource scarcity               | kg Cu eq                      | 2.20E-04 | 0.00E+00          | 1.75E-04    | 3.27E-06 | 4.15E-05         |
| Fossil resource scarcity                | kg oil eq                     | 4.27E-01 | 0.00E+00          | 4.08E-01    | 1.10E-04 | 1.91E-02         |
| Water consumption                       | m <sup>3</sup>                | 9.19E-04 | 0.00E+00          | 1.79E-04    | 3.95E-04 | 3.45E-04         |

**Table S9.** Hybrid ATR-ATR Midpoint Characterisation (ReCiPe Midpoint H 2016), FU= 1kgNH<sub>3</sub>

| Impact Category                         | Unit                          | Total    | Process Emissions | Natural Gas | Water    | Electricity Grid | Green H2 |
|-----------------------------------------|-------------------------------|----------|-------------------|-------------|----------|------------------|----------|
| Global warming                          | kg CO2 eq                     | 7.77E-01 | 4.10E-01          | 1.98E-01    | 4.28E-04 | 8.73E-02         | 8.13E-02 |
| Stratospheric ozone depletion           | kg CFC11 eq X10 <sup>-4</sup> | 2.41E-07 | 0.00E+00          | 1.70E-07    | 3.68E-10 | 3.38E-08         | 3.68E-08 |
| Ionizing radiation                      | kBq Co-60 eq                  | 3.69E-02 | 0.00E+00          | 2.47E-03    | 5.26E-05 | 2.82E-02         | 6.15E-03 |
| Ozone formation, Human health           | kg NOx eq                     | 6.30E-04 | 0.00E+00          | 3.20E-04    | 9.53E-07 | 9.29E-05         | 2.16E-04 |
| Fine particulate matter formation       | kg PM2.5 eq                   | 5.97E-04 | 0.00E+00          | 2.51E-04    | 9.55E-07 | 1.82E-04         | 1.63E-04 |
| Ozone formation, Terrestrial ecosystems | kg NOx eq                     | 6.77E-04 | 0.00E+00          | 3.55E-04    | 9.73E-07 | 9.46E-05         | 2.26E-04 |
| Terrestrial acidification               | kg SO2 eq                     | 1.27E-03 | 0.00E+00          | 7.67E-04    | 1.42E-06 | 1.85E-04         | 3.18E-04 |
| Freshwater eutrophication               | kg P eq                       | 1.12E-04 | 0.00E+00          | 8.95E-06    | 2.26E-07 | 6.07E-05         | 4.16E-05 |
| Marine eutrophication                   | kg N eq                       | 1.37E-05 | 0.00E+00          | 3.26E-06    | 2.39E-08 | 4.38E-06         | 6.04E-06 |
| Terrestrial ecotoxicity                 | kg 1,4-DCB                    | 1.57E+00 | 0.00E+00          | 2.41E-02    | 7.31E-04 | 2.88E-02         | 1.52E+00 |
| Freshwater ecotoxicity                  | kg 1,4-DCB                    | 1.79E-02 | 0.00E+00          | 1.79E-03    | 1.89E-05 | 1.89E-03         | 1.42E-02 |
| Marine ecotoxicity                      | kg 1,4-DCB                    | 2.38E-02 | 0.00E+00          | 2.25E-03    | 2.55E-05 | 2.59E-03         | 1.90E-02 |
| Human carcinogenic toxicity             | kg 1,4-DCB                    | 3.21E-02 | 0.00E+00          | 8.22E-03    | 2.13E-04 | 4.36E-03         | 1.93E-02 |
| Human non-carcinogenic toxicity         | kg 1,4-DCB                    | 3.17E-01 | 0.00E+00          | 3.82E-02    | 4.33E-04 | 7.72E-02         | 2.01E-01 |
| Land use                                | m2a crop eq                   | 3.74E-02 | 0.00E+00          | 8.02E-04    | 1.63E-05 | 3.80E-03         | 3.28E-02 |
| Mineral resource scarcity               | kg Cu eq                      | 1.20E-03 | 0.00E+00          | 1.54E-04    | 3.27E-06 | 5.10E-05         | 9.93E-04 |
| Fossil resource scarcity                | kg oil eq                     | 4.03E-01 | 0.00E+00          | 3.58E-01    | 1.10E-04 | 2.35E-02         | 2.12E-02 |
| Water consumption                       | m3                            | 3.82E-03 | 0.00E+00          | 1.58E-04    | 3.95E-04 | 4.24E-04         | 2.84E-03 |

**Table S10.** BAU SMR-SMR Midpoint Characterisation (ReCiPe Midpoint H 2016), FU= 1kgNH<sub>3</sub>

| Impact Category                         | Unit                          | Total    | Process Emissions | Natural Gas | Water    | Electricity Grid |
|-----------------------------------------|-------------------------------|----------|-------------------|-------------|----------|------------------|
| Global warming                          | kg CO2 eq                     | 1.23E+00 | 9.15E-01          | 2.78E-01    | 5.56E-04 | 3.44E-02         |
| Stratospheric ozone depletion           | kg CFC11 eq X10 <sup>-4</sup> | 2.53E-07 | 0.00E+00          | 2.39E-07    | 4.79E-10 | 1.33E-08         |
| Ionizing radiation                      | kBq Co-60 eq                  | 1.46E-02 | 0.00E+00          | 3.46E-03    | 6.84E-05 | 1.11E-02         |
| Ozone formation, Human health           | kg NOx eq                     | 4.87E-04 | 0.00E+00          | 4.50E-04    | 1.24E-06 | 3.66E-05         |
| Fine particulate matter formation       | kg PM2.5 eq                   | 4.25E-04 | 0.00E+00          | 3.53E-04    | 1.24E-06 | 7.17E-05         |
| Ozone formation, Terrestrial ecosystems | kg NOx eq                     | 5.37E-04 | 0.00E+00          | 4.99E-04    | 1.27E-06 | 3.72E-05         |
| Terrestrial acidification               | kg SO2 eq                     | 1.15E-03 | 0.00E+00          | 1.08E-03    | 1.85E-06 | 7.28E-05         |
| Freshwater eutrophication               | kg P eq                       | 3.68E-05 | 0.00E+00          | 1.26E-05    | 2.94E-07 | 2.39E-05         |
| Marine eutrophication                   | kg N eq                       | 6.33E-06 | 0.00E+00          | 4.57E-06    | 3.11E-08 | 1.72E-06         |
| Terrestrial ecotoxicity                 | kg 1,4-DCB                    | 4.61E-02 | 0.00E+00          | 3.38E-02    | 9.51E-04 | 1.14E-02         |
| Freshwater ecotoxicity                  | kg 1,4-DCB                    | 3.28E-03 | 0.00E+00          | 2.52E-03    | 2.46E-05 | 7.43E-04         |
| Marine ecotoxicity                      | kg 1,4-DCB                    | 4.21E-03 | 0.00E+00          | 3.16E-03    | 3.32E-05 | 1.02E-03         |
| Human carcinogenic toxicity             | kg 1,4-DCB                    | 1.35E-02 | 0.00E+00          | 1.15E-02    | 2.77E-04 | 1.72E-03         |
| Human non-carcinogenic toxicity         | kg 1,4-DCB                    | 8.45E-02 | 0.00E+00          | 5.36E-02    | 5.63E-04 | 3.04E-02         |
| Land use                                | m2a crop eq                   | 2.64E-03 | 0.00E+00          | 1.13E-03    | 2.12E-05 | 1.50E-03         |
| Mineral resource scarcity               | kg Cu eq                      | 2.41E-04 | 0.00E+00          | 2.16E-04    | 4.25E-06 | 2.01E-05         |
| Fossil resource scarcity                | kg oil eq                     | 5.13E-01 | 0.00E+00          | 5.03E-01    | 1.43E-04 | 9.23E-03         |
| Water consumption                       | m3                            | 9.03E-04 | 0.00E+00          | 2.21E-04    | 5.14E-04 | 1.67E-04         |

**Table S11.** Hybrid SMR-SMR Midpoint Characterisation (ReCiPe Midpoint H 2016), FU= 1kgNH<sub>3</sub>

| Impact Category                         | Unit                          | Total    | Process Emissions | Natural Gas | Water    | Electricity Grid | Green H2 | CO <sub>2</sub> from Nat Gas Power Plant |
|-----------------------------------------|-------------------------------|----------|-------------------|-------------|----------|------------------|----------|------------------------------------------|
| Global warming                          | kg CO2 eq                     | 1.15E+00 | 7.49E-01          | 2.50E-01    | 5.09E-04 | 5.26E-02         | 8.11E-02 | 1.25E-02                                 |
| Stratospheric ozone depletion           | kg CFC11 eq X10 <sup>-4</sup> | 2.78E-07 | 0.00E+00          | 2.14E-07    | 4.39E-10 | 2.04E-08         | 3.67E-08 | 6.05E-09                                 |
| Ionizing radiation                      | kBq Co-60 eq                  | 2.64E-02 | 0.00E+00          | 3.10E-03    | 6.26E-05 | 1.70E-02         | 6.13E-03 | 1.11E-04                                 |
| Ozone formation, Human health           | kg NOx eq                     | 7.25E-04 | 0.00E+00          | 4.03E-04    | 1.14E-06 | 5.60E-05         | 2.15E-04 | 4.99E-05                                 |
| Fine particulate matter formation       | kg PM2.5 eq                   | 6.02E-04 | 0.00E+00          | 3.16E-04    | 1.14E-06 | 1.10E-04         | 1.62E-04 | 1.35E-05                                 |
| Ozone formation, Terrestrial ecosystems | kg NOx eq                     | 7.82E-04 | 0.00E+00          | 4.47E-04    | 1.16E-06 | 5.71E-05         | 2.25E-04 | 5.11E-05                                 |
| Terrestrial acidification               | kg SO2 eq                     | 1.44E-03 | 0.00E+00          | 9.65E-04    | 1.69E-06 | 1.12E-04         | 3.17E-04 | 4.16E-05                                 |
| Freshwater eutrophication               | kg P eq                       | 9.01E-05 | 0.00E+00          | 1.13E-05    | 2.69E-07 | 3.66E-05         | 4.15E-05 | 4.56E-07                                 |
| Marine eutrophication                   | kg N eq                       | 1.34E-05 | 0.00E+00          | 4.10E-06    | 2.85E-08 | 2.64E-06         | 6.02E-06 | 6.46E-07                                 |
| Terrestrial ecotoxicity                 | kg 1,4-DCB                    | 1.56E+00 | 0.00E+00          | 3.03E-02    | 8.71E-04 | 1.74E-02         | 1.51E+00 | 1.31E-03                                 |
| Freshwater ecotoxicity                  | kg 1,4-DCB                    | 1.77E-02 | 0.00E+00          | 2.26E-03    | 2.25E-05 | 1.14E-03         | 1.42E-02 | 7.81E-05                                 |
| Marine ecotoxicity                      | kg 1,4-DCB                    | 2.34E-02 | 0.00E+00          | 2.83E-03    | 3.04E-05 | 1.56E-03         | 1.89E-02 | 9.88E-05                                 |
| Human carcinogenic toxicity             | kg 1,4-DCB                    | 3.28E-02 | 0.00E+00          | 1.03E-02    | 2.53E-04 | 2.63E-03         | 1.93E-02 | 3.27E-04                                 |
| Human non-carcinogenic toxicity         | kg 1,4-DCB                    | 2.97E-01 | 0.00E+00          | 4.80E-02    | 5.16E-04 | 4.66E-02         | 2.00E-01 | 1.70E-03                                 |
| Land use                                | m2a crop eq                   | 3.60E-02 | 0.00E+00          | 1.01E-03    | 1.94E-05 | 2.29E-03         | 3.27E-02 | 4.70E-05                                 |
| Mineral resource scarcity               | kg Cu eq                      | 1.22E-03 | 0.00E+00          | 1.94E-04    | 3.90E-06 | 3.08E-05         | 9.89E-04 | 6.72E-06                                 |
| Fossil resource scarcity                | kg oil eq                     | 4.99E-01 | 0.00E+00          | 4.51E-01    | 1.31E-04 | 1.41E-02         | 2.11E-02 | 1.26E-02                                 |
| Water consumption                       | m3                            | 3.77E-03 | 0.00E+00          | 1.98E-04    | 4.71E-04 | 2.56E-04         | 2.83E-03 | 1.29E-05                                 |

**Table S12.** BAU SMR-ATR Midpoint Characterisation (ReCiPe Midpoint H 2016), FU= 1kgNH<sub>3</sub>

| Impact Category                         | Unit                          | Total    | Process Emissions | Natural Gas | Water    | Electricity Grid |
|-----------------------------------------|-------------------------------|----------|-------------------|-------------|----------|------------------|
| Global warming                          | kg CO2 eq                     | 9.85E-01 | 6.90E-01          | 2.36E-01    | 7.11E-04 | 5.88E-02         |
| Stratospheric ozone depletion           | kg CFC11 eq X10 <sup>-4</sup> | 2.26E-07 | 0.00E+00          | 2.03E-07    | 6.13E-10 | 2.28E-08         |
| Ionizing radiation                      | kBq Co-60 eq                  | 2.20E-02 | 0.00E+00          | 2.93E-03    | 8.75E-05 | 1.90E-02         |
| Ozone formation, Human health           | kg NOx eq                     | 4.45E-04 | 0.00E+00          | 3.80E-04    | 1.59E-06 | 6.25E-05         |
| Fine particulate matter formation       | kg PM2.5 eq                   | 4.23E-04 | 0.00E+00          | 2.98E-04    | 1.59E-06 | 1.23E-04         |
| Ozone formation, Terrestrial ecosystems | kg NOx eq                     | 4.87E-04 | 0.00E+00          | 4.22E-04    | 1.62E-06 | 6.37E-05         |
| Terrestrial acidification               | kg SO2 eq                     | 1.04E-03 | 0.00E+00          | 9.11E-04    | 2.36E-06 | 1.25E-04         |
| Freshwater eutrophication               | kg P eq                       | 5.19E-05 | 0.00E+00          | 1.06E-05    | 3.75E-07 | 4.09E-05         |
| Marine eutrophication                   | kg N eq                       | 6.86E-06 | 0.00E+00          | 3.87E-06    | 3.98E-08 | 2.95E-06         |
| Terrestrial ecotoxicity                 | kg 1,4-DCB                    | 4.93E-02 | 0.00E+00          | 2.86E-02    | 1.22E-03 | 1.94E-02         |
| Freshwater ecotoxicity                  | kg 1,4-DCB                    | 3.43E-03 | 0.00E+00          | 2.13E-03    | 3.15E-05 | 1.27E-03         |
| Marine ecotoxicity                      | kg 1,4-DCB                    | 4.46E-03 | 0.00E+00          | 2.67E-03    | 4.25E-05 | 1.74E-03         |
| Human carcinogenic toxicity             | kg 1,4-DCB                    | 1.31E-02 | 0.00E+00          | 9.77E-03    | 3.54E-04 | 2.94E-03         |
| Human non-carcinogenic toxicity         | kg 1,4-DCB                    | 9.80E-02 | 0.00E+00          | 4.53E-02    | 7.20E-04 | 5.20E-02         |
| Land use                                | m2a crop eq                   | 3.54E-03 | 0.00E+00          | 9.53E-04    | 2.71E-05 | 2.56E-03         |
| Mineral resource scarcity               | kg Cu eq                      | 2.23E-04 | 0.00E+00          | 1.83E-04    | 5.44E-06 | 3.44E-05         |
| Fossil resource scarcity                | kg oil eq                     | 4.42E-01 | 0.00E+00          | 4.26E-01    | 1.82E-04 | 1.58E-02         |
| Water consumption                       | m3                            | 1.13E-03 | 0.00E+00          | 1.87E-04    | 6.58E-04 | 2.86E-04         |

**Table S13.** Hybrid SMR-ATR Midpoint Characterisation (ReCiPe Midpoint H 2016), FU= 1kgNH<sub>3</sub>

| Impact Category                         | Unit                          | Total    | Process Emissions | Natural Gas | Water    | Electricity Grid | Green H2 |
|-----------------------------------------|-------------------------------|----------|-------------------|-------------|----------|------------------|----------|
| Global warming                          | kg CO2 eq                     | 8.40E-01 | 4.75E-01          | 2.07E-01    | 6.65E-04 | 7.70E-02         | 8.11E-02 |
| Stratospheric ozone depletion           | kg CFC11 eq X10 <sup>-4</sup> | 2.45E-07 | 0.00E+00          | 1.78E-07    | 5.73E-10 | 2.98E-08         | 3.67E-08 |
| Ionizing radiation                      | kBq Co-60 eq                  | 3.37E-02 | 0.00E+00          | 2.57E-03    | 8.17E-05 | 2.49E-02         | 6.13E-03 |
| Ozone formation, Human health           | kg NOx eq                     | 6.33E-04 | 0.00E+00          | 3.34E-04    | 1.48E-06 | 8.20E-05         | 2.15E-04 |
| Fine particulate matter formation       | kg PM2.5 eq                   | 5.86E-04 | 0.00E+00          | 2.62E-04    | 1.48E-06 | 1.61E-04         | 1.62E-04 |
| Ozone formation, Terrestrial ecosystems | kg NOx eq                     | 6.81E-04 | 0.00E+00          | 3.70E-04    | 1.51E-06 | 8.35E-05         | 2.25E-04 |
| Terrestrial acidification               | kg SO2 eq                     | 1.28E-03 | 0.00E+00          | 7.99E-04    | 2.21E-06 | 1.63E-04         | 3.17E-04 |
| Freshwater eutrophication               | kg P eq                       | 1.05E-04 | 0.00E+00          | 9.33E-06    | 3.51E-07 | 5.36E-05         | 4.15E-05 |
| Marine eutrophication                   | kg N eq                       | 1.33E-05 | 0.00E+00          | 3.39E-06    | 3.72E-08 | 3.87E-06         | 6.02E-06 |
| Terrestrial ecotoxicity                 | kg 1,4-DCB                    | 1.56E+00 | 0.00E+00          | 2.51E-02    | 1.14E-03 | 2.55E-02         | 1.51E+00 |
| Freshwater ecotoxicity                  | kg 1,4-DCB                    | 1.77E-02 | 0.00E+00          | 1.87E-03    | 2.94E-05 | 1.67E-03         | 1.42E-02 |
| Marine ecotoxicity                      | kg 1,4-DCB                    | 2.36E-02 | 0.00E+00          | 2.34E-03    | 3.97E-05 | 2.28E-03         | 1.89E-02 |
| Human carcinogenic toxicity             | kg 1,4-DCB                    | 3.20E-02 | 0.00E+00          | 8.57E-03    | 3.31E-04 | 3.85E-03         | 1.93E-02 |
| Human non-carcinogenic toxicity         | kg 1,4-DCB                    | 3.09E-01 | 0.00E+00          | 3.98E-02    | 6.73E-04 | 6.81E-02         | 2.00E-01 |
| Land use                                | m2a crop eq                   | 3.69E-02 | 0.00E+00          | 8.36E-04    | 2.53E-05 | 3.36E-03         | 3.27E-02 |
| Mineral resource scarcity               | kg Cu eq                      | 1.20E-03 | 0.00E+00          | 1.60E-04    | 5.08E-06 | 4.50E-05         | 9.89E-04 |
| Fossil resource scarcity                | kg oil eq                     | 4.16E-01 | 0.00E+00          | 3.74E-01    | 1.70E-04 | 2.07E-02         | 2.11E-02 |
| Water consumption                       | m3                            | 3.99E-03 | 0.00E+00          | 1.64E-04    | 6.15E-04 | 3.74E-04         | 2.83E-03 |

**Table S14.** BAU GHR-ATR Endpoint Characterisation (ReCiPe Endpoint H 2016), FU= 1kgNH<sub>3</sub>

| Impact Category    | Unit       | Total    | Process Emissions | Natural Gas | Water    | Electricity Grid |
|--------------------|------------|----------|-------------------|-------------|----------|------------------|
| Human Health       | DALY       | 1.38E-06 | 4.38E-07          | 3.93E-07    | 3.11E-09 | 5.51E-07         |
| Ecosystem Quality  | species.yr | 3.05E-09 | 1.32E-09          | 8.11E-10    | 8.43E-12 | 9.05E-10         |
| Resource Depletion | USD2013    | 1.44E-01 | 0.00E+00          | 1.33E-01    | 2.91E-05 | 1.13E-02         |

**Table S15.** Hybrid GHR-ATR Endpoint Characterisation (ReCiPe Endpoint H 2016), FU= 1kgNH<sub>3</sub>

| Impact Category    | Unit       | Total    | Process Emissions | Natural Gas | Water    | Electricity Grid | Green H <sub>2</sub> |
|--------------------|------------|----------|-------------------|-------------|----------|------------------|----------------------|
| Human Health       | DALY       | 1.45E-06 | 2.71E-07          | 3.47E-07    | 3.04E-09 | 5.34E-07         | 2.91E-07             |
| Ecosystem Quality  | species.yr | 3.12E-09 | 8.18E-10          | 7.16E-10    | 8.23E-12 | 8.77E-10         | 6.97E-10             |
| Resource Depletion | USD2013    | 1.34E-01 | 0.00E+00          | 1.17E-01    | 2.85E-05 | 1.10E-02         | 5.25E-03             |

**Table S16.** BAU GHR-SMR Endpoint Characterisation (ReCiPe Endpoint H 2016), FU= 1kgNH<sub>3</sub>

| Impact Category    | Unit       | Total    | Process Emissions | Natural Gas | Water    | Electricity Grid |
|--------------------|------------|----------|-------------------|-------------|----------|------------------|
| Human Health       | DALY       | 1.61E-06 | 6.46E-07          | 4.75E-07    | 2.13E-09 | 4.87E-07         |
| Ecosystem Quality  | species.yr | 3.73E-09 | 1.95E-09          | 9.80E-10    | 5.79E-12 | 8.00E-10         |
| Resource Depletion | USD2013    | 1.71E-01 | 0.00E+00          | 1.61E-01    | 2.00E-05 | 1.00E-02         |

**Table S17.** Hybrid GHR-SMR Endpoint Characterisation (ReCiPe Endpoint H 2016), FU= 1kgNH<sub>3</sub>

| Impact Category    | Unit       | Total    | Process Emissions | Natural Gas | Water    | Electricity Grid | Green H <sub>2</sub> |
|--------------------|------------|----------|-------------------|-------------|----------|------------------|----------------------|
| Human Health       | DALY       | 1.67E-06 | 4.79E-07          | 4.29E-07    | 2.06E-09 | 4.70E-07         | 2.91E-07             |
| Ecosystem Quality  | species.yr | 3.80E-09 | 1.44E-09          | 8.85E-10    | 5.60E-12 | 7.72E-10         | 6.97E-10             |
| Resource Depletion | USD2013    | 1.60E-01 | 0.00E+00          | 1.45E-01    | 1.93E-05 | 9.66E-03         | 5.25E-03             |

**Table S18.** BAU ATR-SMR Endpoint Characterisation (ReCiPe Endpoint H 2016), FU= 1kgNH<sub>3</sub>

| Impact Category   | Unit       | Total    | Process Emissions | Natural Gas | Water    | Electricity Grid |
|-------------------|------------|----------|-------------------|-------------|----------|------------------|
| Human Health      | DALY       | 1.41E-06 | 7.75E-07          | 5.11E-07    | 1.70E-09 | 1.21E-07         |
| Ecosystem Quality | species.yr | 3.60E-09 | 2.34E-09          | 1.05E-09    | 4.60E-12 | 1.99E-10         |



|                    |         |          |          |          |          |          |
|--------------------|---------|----------|----------|----------|----------|----------|
| Resource Depletion | USD2013 | 1.75E-01 | 0.00E+00 | 1.73E-01 | 1.59E-05 | 2.49E-03 |
|--------------------|---------|----------|----------|----------|----------|----------|

**Table S19.** Hybrid ATR-SMR Endpoint Characterisation (ReCiPe Endpoint H 2016), FU= 1kgNH<sub>3</sub>

| Impact Category    | Unit       | Total    | Process Emissions | Natural Gas | Water    | Electricity Grid | Green H <sub>2</sub> |
|--------------------|------------|----------|-------------------|-------------|----------|------------------|----------------------|
| Human Health       | DALY       | 1.50E-06 | 5.87E-07          | 4.59E-07    | 1.70E-09 | 1.64E-07         | 2.91E-07             |
| Ecosystem Quality  | species.yr | 3.69E-09 | 1.77E-09          | 9.47E-10    | 4.60E-12 | 2.69E-10         | 6.97E-10             |
| Resource Depletion | USD2013    | 1.64E-01 | 0.00E+00          | 1.55E-01    | 1.59E-05 | 3.37E-03         | 5.25E-03             |

**Table S20.** BAU ATR-ATR Endpoint Characterisation (ReCiPe Endpoint H 2016), FU= 1kgNH<sub>3</sub>

| Impact Category    | Unit       | Total    | Process Emissions | Natural Gas | Water    | Electricity Grid |
|--------------------|------------|----------|-------------------|-------------|----------|------------------|
| Human Health       | DALY       | 1.19E-06 | 5.69E-07          | 4.30E-07    | 2.68E-09 | 1.86E-07         |
| Ecosystem Quality  | species.yr | 2.92E-09 | 1.72E-09          | 8.88E-10    | 7.27E-12 | 3.05E-10         |
| Resource Depletion | USD2013    | 1.50E-01 | 0.00E+00          | 1.46E-01    | 2.51E-05 | 3.82E-03         |

**Table S21.** Hybrid ATR-ATR Endpoint Characterisation (ReCiPe Endpoint H 2016), FU= 1kgNH<sub>3</sub>

| Impact Category    | Unit       | Total    | Process Emissions | Natural Gas | Water    | Electricity Grid | Green H <sub>2</sub> |
|--------------------|------------|----------|-------------------|-------------|----------|------------------|----------------------|
| Human Health       | DALY       | 1.28E-06 | 3.81E-07          | 3.78E-07    | 2.68E-09 | 2.28E-07         | 2.92E-07             |
| Ecosystem Quality  | species.yr | 3.01E-09 | 1.15E-09          | 7.81E-10    | 7.27E-12 | 3.75E-10         | 7.00E-10             |
| Resource Depletion | USD2013    | 1.38E-01 | 0.00E+00          | 1.28E-01    | 2.51E-05 | 4.70E-03         | 5.26E-03             |

**Table S22.** BAU SMR-SMR Endpoint Characterisation (ReCiPe Endpoint H 2016), FU= 1kgNH<sub>3</sub>

| Impact Category    | Unit       | Total    | Process Emissions | Natural Gas | Water    | Electricity Grid |
|--------------------|------------|----------|-------------------|-------------|----------|------------------|
| Human Health       | DALY       | 1.47E-06 | 8.49E-07          | 5.31E-07    | 3.48E-09 | 8.99E-08         |
| Ecosystem Quality  | species.yr | 3.81E-09 | 2.56E-09          | 1.10E-09    | 9.45E-12 | 1.48E-10         |
| Resource Depletion | USD2013    | 1.82E-01 | 0.00E+00          | 1.80E-01    | 3.27E-05 | 1.85E-03         |

**Table S23.** Hybrid SMR-SMR Endpoint Characterisation (ReCiPe Endpoint H 2016), FU= 1kgNH<sub>3</sub>

| Impact Category    | Unit       | Total    | Process Emissions | Natural Gas | Water    | Electricity Grid | Green H <sub>2</sub> | CO <sub>2</sub> from Nat Gas Power Plant |
|--------------------|------------|----------|-------------------|-------------|----------|------------------|----------------------|------------------------------------------|
| Human Health       | DALY       | 1.62E-06 | 6.95E-07          | 4.76E-07    | 3.19E-09 | 1.38E-07         | 2.91E-07             | 2.16E-08                                 |
| Ecosystem Quality  | species.yr | 4.06E-09 | 2.10E-09          | 9.82E-10    | 8.66E-12 | 2.26E-10         | 6.97E-10             | 5.12E-11                                 |
| Resource Depletion | USD2013    | 1.74E-01 | 0.00E+00          | 1.61E-01    | 2.99E-05 | 2.83E-03         | 5.25E-03             | 4.51E-03                                 |

**Table S24.** BAU SMR-ATR Endpoint Characterisation (ReCiPe Endpoint H 2016), FU= 1kgNH<sub>3</sub>

| Impact Category    | Unit       | Total    | Process Emissions | Natural Gas | Water    | Electricity Grid |
|--------------------|------------|----------|-------------------|-------------|----------|------------------|
| Human Health       | DALY       | 1.25E-06 | 6.41E-07          | 4.49E-07    | 4.46E-09 | 1.54E-07         |
| Ecosystem Quality  | species.yr | 3.12E-09 | 1.93E-09          | 9.28E-10    | 1.21E-11 | 2.53E-10         |
| Resource Depletion | USD2013    | 1.55E-01 | 0.00E+00          | 1.52E-01    | 4.18E-05 | 3.16E-03         |

**Table S25.** Hybrid SMR-ATR Endpoint Characterisation (ReCiPe Endpoint H 2016), FU= 1kgNH<sub>3</sub>

| Impact Category    | Unit       | Total    | Process Emissions | Natural Gas | Water    | Electricity Grid | Green H <sub>2</sub> |
|--------------------|------------|----------|-------------------|-------------|----------|------------------|----------------------|
| Human Health       | DALY       | 1.33E-06 | 4.41E-07          | 3.94E-07    | 4.16E-09 | 2.02E-07         | 2.91E-07             |
| Ecosystem Quality  | species.yr | 3.18E-09 | 1.33E-09          | 8.14E-10    | 1.13E-11 | 3.31E-10         | 6.97E-10             |
| Resource Depletion | USD2013    | 1.43E-01 | 0.00E+00          | 1.33E-01    | 3.90E-05 | 4.15E-03         | 5.25E-03             |

## References

1. IEA, *Global Hydrogen Review 2023*, IEA, Paris, 2023.
2. A. González-Garay, M. S. Frei, A. Al-Qahtani, C. Mondelli, G. Guillén-Gosálbez and J. Pérez-Ramírez, *Energy Environ. Sci.*, 2019, **12**, 3425-3436.
3. R. Dufo-López, J. M. Lujano-Rojas and J. L. Bernal-Agustín, *Int. J. Hydrogen Energy*, 2024, **50**, 292-309.
4. EIA, Capacity factors and usage factors at electric generators, [https://www.eia.gov/state/seds/data.php?incfile=/state/seds/sep\\_fuel/html/fuel\\_cf.html&sid=LA](https://www.eia.gov/state/seds/data.php?incfile=/state/seds/sep_fuel/html/fuel_cf.html&sid=LA), (accessed May 20, 2024).
